# Supplementary material for: Eligibility for the 4 Pharmacological Pillars in Heart Failure With Reduced Ejection Fraction at Discharge
Source: PubMed Central journal article supplement — J Am Heart Assoc. 2023 Jun 29;12(13):e029071. doi: 10.1161/JAHA.122.029071 (PMC10356099; doi:10.1161/jaha.122.029071), 2023-06-29
Supplement: JAH3-12-e029071-s001.pdf [file JAH3-12-e029071-s001.pdf]

## **SUPPLEMENTAL MATERIAL**

## Data S1.

### Supplemental Methods

#### *Data quality and completeness (9)*

The analysis framework includes a dedicated data quality assurance process during data integration in the GENERATOR HF DataMart.

In broad terms, we adopt a validation scheme using evidence from different data sources with the guidance of clinicians, who also conduct independent incremental checks on the quality of the results.

As an example, the assessment of comorbidities could be considered. First, to exploit information from unstructured data in several medical records (such as clinical diaries, nurse diaries, consultancies, diagnostic exams) the clinical team supports data scientists with an annotation phase on a large set of sample documents. The clinical team provides keywords, representative example sentences, indirect evidence included in the documents, which are used by the technical team to implement machine-learning algorithms, i.e. Natural Language Processing (NLP), in order to identify the presence/absence of such comorbidity in the clinical history of a specific patient. Such methods do not imply just the parsing of specific sentences, since the algorithms help identifying semantically equivalent sentences associated to the variable (comorbidity in this example), through the so called 'topic models', and supports the elimination of confounding factors, such as occurrence of negations, reference to familiarities or risk factors.

Once the data scientists have generated a first round of NLP-based identification of comorbidities, a new sample set is used to test the procedure. These new cases are shared with the clinical team in order to perform an independent check, which allows to identify any potential defects generated by the machine learning model, through which the technical team can improve the accuracy of such algorithms.

Then the cross-check validation is performed, which makes use of independent data; for most cases, the occurrence of a comorbidity is associated with well-defined critical ranges for specific laboratory values (such as: glycated hemoglobin, creatinine). This validation, performed on a significant set of test cases, allows to further improve the identification method and adjudicate comorbidities with a high degree of accuracy.

Once the HF Data Mart is built based on the above steps, clinicians have the possibility to control overall consistency with aggregated type of analysis, by using the dashboard linked to the datamart, where they can select subgroups of patients (e.g., the ones characterized with a specific comorbidity) and analyze the distribution of relevant clinical data for such populations.

Finally, as a technical step to evaluate the data quality of the extracted data, we sample several subsets of data (both in patients and variable sets), and we calculate quantitative variable distributions and binary variable incidences among samples. Then, we perform statistical tests to ensure low statistical differences among them and the overall consistency of the entire dataset.

**Table S1.** Contraindications and cautions of recommended medications according to the European Society of Cardiology Guidelines on Heart Failure 2021

| <b>ACEi/ARNi/ARB</b>                        |                                                                              |
|---------------------------------------------|------------------------------------------------------------------------------|
| <b>Contraindications</b>                    |                                                                              |
| History of angioedema                       |                                                                              |
| Bilateral renal artery stenosis             |                                                                              |
| Pregnancy                                   | Female gender and age less than 50 years                                     |
| ACEi/ARB/ARNi adverse reaction              | Known allergic reaction/other adverse reaction to ACEi/ARB/ARNi              |
| <b>Cautions</b>                             |                                                                              |
| Hyperkalaemia                               | Potassium>5.0 mEq/L                                                          |
| Significant renal dysfunction               | eGFR<30 ml/min/1.73m <sup>2</sup> or Creatinine>2.5 mg/dL                    |
| Hypotension                                 | Systolic blood pressure<90 mmHg or symptomatic hypotension                   |
| <b>β-blocker</b>                            |                                                                              |
| <b>Contraindications</b>                    |                                                                              |
| AV block II/III without permanent pacemaker | Second or third degree of AV block (in the absence of a permanent pacemaker) |
| Critical limb ischaemia                     |                                                                              |
| Asthma                                      |                                                                              |
| β-blocker adverse reaction                  | Known allergic reaction/other adverse reaction to β-blocker                  |
| <b>Cautions</b>                             |                                                                              |
| NYHA IV                                     |                                                                              |
| Heart block                                 | Heart rate<50 bpm                                                            |
| Hypotension                                 | Systolic blood pressure<90 mmHg or symptomatic hypotension                   |
| Congestion                                  | Raised jugular venous pressure, ascites, marked peripheral edema             |
| <b>MRA</b>                                  |                                                                              |
| <b>Contraindications</b>                    |                                                                              |
| MRA adverse reaction                        | Known allergic reaction/other adverse reaction to MRA                        |
| <b>Cautions</b>                             |                                                                              |
| Hyperkalaemia                               | Potassium>5.0 mEq/L                                                          |
| Significant renal dysfunction               | eGFR<30 ml/min/1.73m <sup>2</sup> or Creatinine>2.5 mg/dL                    |
| <b>SGLT2i</b>                               |                                                                              |
| <b>Contraindications</b>                    |                                                                              |
| SGLT2i adverse condition                    | Known allergic reaction/other adverse reaction to SGLT2i                     |
| Pregnancy                                   | Female gender and age less than 50 years                                     |
| Significant renal dysfunction               | eGFR<20 ml/min/1.73m <sup>2</sup>                                            |
| Hypotension                                 | Systolic blood pressure<95 mmHg or symptomatic hypotension                   |
| <b>Cautions</b>                             |                                                                              |
| Diabetes Type 1                             |                                                                              |
| Genito-urinary infections                   |                                                                              |

ACEi, angiotensin-converting enzyme inhibitors; ARB, angiotensin receptor blockers; ARNi, angiotensin receptor–neprilysin inhibitor; MRA, mineralocorticoid receptor antagonists; SGLT2i, Sodium-glucose co-transporter 2 inhibitors; AV, atrioventricular ; NYHA, New York Heart Association

**Table S2. Variables definition**

| <b>Variable</b>                                                                                                                                                                                                                                                                                                                                                                                                 | <b>Definition</b>                                                            |
|-----------------------------------------------------------------------------------------------------------------------------------------------------------------------------------------------------------------------------------------------------------------------------------------------------------------------------------------------------------------------------------------------------------------|------------------------------------------------------------------------------|
| eGFR                                                                                                                                                                                                                                                                                                                                                                                                            | Estimated glomerular filtration rate calculated based on CKD-EPI 2021        |
| Pregnancy                                                                                                                                                                                                                                                                                                                                                                                                       | Female gender and age less than 50 years                                     |
| ACEi/ARB/ARNi adverse reaction                                                                                                                                                                                                                                                                                                                                                                                  | Known allergic reaction/other adverse reaction to ACEi/ARB/ARNi              |
| Hyperkalemia                                                                                                                                                                                                                                                                                                                                                                                                    | Potassium>5.0 mEq/L                                                          |
| Significant renal dysfunction [ACEi/ARB/ARNi and $\beta$ -blocker ]                                                                                                                                                                                                                                                                                                                                             | eGFR<30 ml/min/1.73m <sup>2</sup> or Creatinine>2.5 mg/dL                    |
| Hypotension [ACEi/ARB/ARNi]                                                                                                                                                                                                                                                                                                                                                                                     | Systolic blood pressure<90 mmHg or symptomatic hypotension                   |
| AV block II/III without permanent pacemaker                                                                                                                                                                                                                                                                                                                                                                     | Second or third degree of AV block (in the absence of a permanent pacemaker) |
| $\beta$ -blocker adverse reaction                                                                                                                                                                                                                                                                                                                                                                               | Known allergic reaction/other adverse reaction to $\beta$ -blocker           |
| NYHA IV                                                                                                                                                                                                                                                                                                                                                                                                         | New York Heart Association Class IV                                          |
| Heart block                                                                                                                                                                                                                                                                                                                                                                                                     | Heart rate<50 bpm                                                            |
| Hypotension [ $\beta$ -blocker]                                                                                                                                                                                                                                                                                                                                                                                 | Systolic blood pressure<90 mmHg                                              |
| Congestion                                                                                                                                                                                                                                                                                                                                                                                                      | Raised jugular venous pressure, ascites, marked peripheral edema             |
| MRA adverse reaction                                                                                                                                                                                                                                                                                                                                                                                            | Known allergic reaction/other adverse reaction to MRA                        |
| SGLT2i adverse condition                                                                                                                                                                                                                                                                                                                                                                                        | Known allergic reaction/other adverse reaction to SGLT2i                     |
| Significant renal dysfunction [SGLT2i]                                                                                                                                                                                                                                                                                                                                                                          | eGFR<20 ml/min/1.73m <sup>2</sup>                                            |
| Hypotension [SGLT2i]                                                                                                                                                                                                                                                                                                                                                                                            | Systolic blood pressure<95 mmHg or symptomatic hypotension                   |
| All included variables reported at the date of discharge. ACEi, angiotensin-converting enzyme inhibitors; ARB, angiotensin receptor blockers; ARNi, angiotensin receptor–neprilysin inhibitor; MRA,mineralocorticoid receptor antagonists; NYHA,New York Heart Association;NT-proBNP, N-terminal pro hormone brain natriuretic peptide; SGLT2i,Sodium-glucose co-transporter 2 inhibitors; AV, atrioventricular |                                                                              |

**Table S3.** Baseline characteristics of the overall population

| Variables                                                                                                                                                                                                                                                                                                                                                                                                                                                                                                    | Total patients (n = 305) | Missing rate |
|--------------------------------------------------------------------------------------------------------------------------------------------------------------------------------------------------------------------------------------------------------------------------------------------------------------------------------------------------------------------------------------------------------------------------------------------------------------------------------------------------------------|--------------------------|--------------|
| <b>Demographics/organizational/socioeconomic</b>                                                                                                                                                                                                                                                                                                                                                                                                                                                             |                          |              |
| Age (years), median(IQR)                                                                                                                                                                                                                                                                                                                                                                                                                                                                                     | 73.0 (63.0,81.0)         | 0 (0.0%)     |
| Male sex                                                                                                                                                                                                                                                                                                                                                                                                                                                                                                     | 226 (74.1%)              | 0 (0.0%)     |
| Education                                                                                                                                                                                                                                                                                                                                                                                                                                                                                                    |                          | 101 (33.1%)  |
| No education                                                                                                                                                                                                                                                                                                                                                                                                                                                                                                 | 3 (1.0%)                 |              |
| Primary                                                                                                                                                                                                                                                                                                                                                                                                                                                                                                      | 40 (13.1%)               |              |
| Secondary                                                                                                                                                                                                                                                                                                                                                                                                                                                                                                    | 127 (41.6%)              |              |
| Higher                                                                                                                                                                                                                                                                                                                                                                                                                                                                                                       | 34 (11.1%)               |              |
| Married                                                                                                                                                                                                                                                                                                                                                                                                                                                                                                      | 166 (54.4%)              | 81 (26.6%)   |
| <b>Clinical</b>                                                                                                                                                                                                                                                                                                                                                                                                                                                                                              |                          |              |
| NYHA                                                                                                                                                                                                                                                                                                                                                                                                                                                                                                         |                          | 237 (77.7%)  |
| I                                                                                                                                                                                                                                                                                                                                                                                                                                                                                                            | 3 (1.0%)                 |              |
| II                                                                                                                                                                                                                                                                                                                                                                                                                                                                                                           | 12 (3.9%)                |              |
| III                                                                                                                                                                                                                                                                                                                                                                                                                                                                                                          | 39 (12.8%)               |              |
| IV                                                                                                                                                                                                                                                                                                                                                                                                                                                                                                           | 14 (4.6%)                |              |
| Heart rate (bpm), median (IQR)                                                                                                                                                                                                                                                                                                                                                                                                                                                                               | 73.0 (66.0,80.0)         | 11 (3.6%)    |
| AV block                                                                                                                                                                                                                                                                                                                                                                                                                                                                                                     |                          | 0 (0.0%)     |
| I                                                                                                                                                                                                                                                                                                                                                                                                                                                                                                            | 9 (3.0%)                 |              |
| II                                                                                                                                                                                                                                                                                                                                                                                                                                                                                                           | 5 (1.6%)                 |              |
| III                                                                                                                                                                                                                                                                                                                                                                                                                                                                                                          | 9 (3.0%)                 |              |
| Systolic blood pressure (mmHg), median (IQR)                                                                                                                                                                                                                                                                                                                                                                                                                                                                 | 115.0 (110.0,125.0)      | 11 (3.6%)    |
| BMI(kg/m <sup>2</sup> ), median (IQR)                                                                                                                                                                                                                                                                                                                                                                                                                                                                        | 25.8 (23.0,28.7)         | 6 (2.0%)     |
| <b>Laboratory values</b>                                                                                                                                                                                                                                                                                                                                                                                                                                                                                     |                          |              |
| Hemoglobin(g/dL), median (IQR)                                                                                                                                                                                                                                                                                                                                                                                                                                                                               | 12.8 (11.0,14.6)         | 3 (1.0%)     |
| NT-ProBNP(pg/mL), median (IQR)                                                                                                                                                                                                                                                                                                                                                                                                                                                                               | 3744.5 (1337.0,9818.5)   | 29 (9.5%)    |
| eGFR (ml/min/1.73m <sup>2</sup> ), median (IQR)                                                                                                                                                                                                                                                                                                                                                                                                                                                              | 61.5 (40.0,80.0)         | 2 (0.7%)     |
| Potassium (mEq/L), median (IQR)                                                                                                                                                                                                                                                                                                                                                                                                                                                                              | 4.1 (4.0,4.4)            | 2 (0.7%)     |
| <b>History and comorbidities</b>                                                                                                                                                                                                                                                                                                                                                                                                                                                                             |                          |              |
| Diabetes                                                                                                                                                                                                                                                                                                                                                                                                                                                                                                     | 93 (30.5%)               | 0 (0.0%)     |
| Pulmonary disease                                                                                                                                                                                                                                                                                                                                                                                                                                                                                            | 82 (26.9%)               | 0 (0.0%)     |
| Malignant disease                                                                                                                                                                                                                                                                                                                                                                                                                                                                                            | 58 (19.0%)               | 0 (0.0%)     |
| Hypertension                                                                                                                                                                                                                                                                                                                                                                                                                                                                                                 | 198 (64.9%)              | 0 (0.0%)     |
| Hepatic disease                                                                                                                                                                                                                                                                                                                                                                                                                                                                                              | 5 (1.6%)                 | 0 (0.0%)     |
| <b>Treatment</b>                                                                                                                                                                                                                                                                                                                                                                                                                                                                                             |                          |              |
| β-blockers                                                                                                                                                                                                                                                                                                                                                                                                                                                                                                   | 285 (93.4%)              | 0 (0.0%)     |
| ACEi                                                                                                                                                                                                                                                                                                                                                                                                                                                                                                         | 42 (13.8%)               | 0 (0.0%)     |
| ARB                                                                                                                                                                                                                                                                                                                                                                                                                                                                                                          | 37 (12.1%)               | 0 (0.0%)     |
| ARNi                                                                                                                                                                                                                                                                                                                                                                                                                                                                                                         | 129 (42.3%)              | 0 (0.0%)     |
| MRA                                                                                                                                                                                                                                                                                                                                                                                                                                                                                                          | 99 (32.5%)               | 0 (0.0%)     |
| SGLT2i                                                                                                                                                                                                                                                                                                                                                                                                                                                                                                       | 14 (4.6%)                | 0 (0.0%)     |
| Diuretics                                                                                                                                                                                                                                                                                                                                                                                                                                                                                                    | 273 (89.5%)              | 0 (0.0%)     |
| Digoxin                                                                                                                                                                                                                                                                                                                                                                                                                                                                                                      | 19 (6.2%)                | 0 (0.0%)     |
| Statin                                                                                                                                                                                                                                                                                                                                                                                                                                                                                                       | 148 (48.5%)              | 0 (0.0%)     |
| Acetylsalicylic acid (ASA)                                                                                                                                                                                                                                                                                                                                                                                                                                                                                   | 81 (26.6%)               | 0 (0.0%)     |
| All included variables reported at the date of discharge. ACEi, angiotensin-converting enzyme inhibitor; ARB, angiotensin receptor blockers; ARNi, angiotensin receptor–neprilysin inhibitor; BMI, body mass index; eGFR, estimated glomerular filtration rate; IQR,interquartile range; MRA, mineralocorticoid receptor antagonists; NYHA,New York Heart Association; NT-proBNP, N-terminal pro hormone brain natriuretic peptide; SGLT2i, Sodium-glucose co-transporter 2 inhibitors; AV, atrioventricular |                          |              |

**Table S4.** Prevalence of contraindications and cautions according to drug type

| Pillar                                                                                                                                                                                                                                                                                                                                                              | Total patients (n = 305) | Prescribed  | Not prescribed | Missing rate (%) (n = 305) |
|---------------------------------------------------------------------------------------------------------------------------------------------------------------------------------------------------------------------------------------------------------------------------------------------------------------------------------------------------------------------|--------------------------|-------------|----------------|----------------------------|
| <b>ACEi/ARB/ARNi</b>                                                                                                                                                                                                                                                                                                                                                |                          | 208 (68.2%) | 97 (31.8%)     | -                          |
| <b>Contraindications</b>                                                                                                                                                                                                                                                                                                                                            |                          |             |                | -                          |
| History of angioedema                                                                                                                                                                                                                                                                                                                                               | 0, (0.0%)                | 0, (0.0%)   | 0, (0.0%)      | Not estimable              |
| Bilateral renal artery stenosis                                                                                                                                                                                                                                                                                                                                     | 0, (0.0%)                | 0, (0.0%)   | 0, (0.0%)      | Not estimable              |
| Pregnancy                                                                                                                                                                                                                                                                                                                                                           | 3, (1.0%)                | 3, (1.4%)   | 0, (0.0%)      | 0, (0.0%)                  |
| ACEi/ARB/ARNi adverse reaction                                                                                                                                                                                                                                                                                                                                      | 2, (0.7%)                | 1, (0.5%)   | 1, (1.0%)      | Not estimable              |
| <b>Cautions</b>                                                                                                                                                                                                                                                                                                                                                     |                          |             |                |                            |
| Hyperkalemia                                                                                                                                                                                                                                                                                                                                                        | 20, (6.6%)               | 9, (4.3%)   | 11, (11.3%)    | 2 (0.7%)                   |
| Significant renal dysfunction                                                                                                                                                                                                                                                                                                                                       | 40, (13.1%)              | 7, (3.4%)   | 33, (34.0%)    | 2 (0.7%)                   |
| Hypotension                                                                                                                                                                                                                                                                                                                                                         | 36, (11.8%)              | 16, (7.7%)  | 20, (20.6%)    | 11 (3.6%)                  |
| <b>β-blocker</b>                                                                                                                                                                                                                                                                                                                                                    |                          | 285 (93.4%) | 20 (6.6%)      | -                          |
| <b>Contraindications</b>                                                                                                                                                                                                                                                                                                                                            |                          |             |                |                            |
| AV block II/III without permanent pacemaker                                                                                                                                                                                                                                                                                                                         | 3, (1.0%)                | 3, (1.1%)   | 0, (0.0%)      | Not estimable              |
| Critical limb ischaemia                                                                                                                                                                                                                                                                                                                                             | 17, (5.6%)               | 15, (5.3%)  | 2.0, (10.0%)   | Not estimable              |
| β-blocker adverse reaction                                                                                                                                                                                                                                                                                                                                          | 1, (0.3%)                | 1, (0.4%)   | 0, (0.0%)      | Not estimable              |
| <b>Cautions</b>                                                                                                                                                                                                                                                                                                                                                     |                          |             |                | -                          |
| NYHA IV                                                                                                                                                                                                                                                                                                                                                             | 14, (4.6%)               | 13, (4.6%)  | 1, (5.0%)      | Not estimable              |
| Heart block                                                                                                                                                                                                                                                                                                                                                         | 2, (0.7%)                | 0, (0.0%)   | 2, (10.0%)     | 11 (3.6%)                  |
| Hypotension                                                                                                                                                                                                                                                                                                                                                         | 0, (0.0%)                | 0, (0.0%)   | 0, (0.0%)      | 11 (3.6%)                  |
| Congestion                                                                                                                                                                                                                                                                                                                                                          | 5, (1.6%)                | 5, (1.8%)   | 0, (0.0%)      | Not estimable              |
| Asthma                                                                                                                                                                                                                                                                                                                                                              | 13, (4.3%)               | 13, (4.6%)  | 0, (0.0%)      | Not estimable              |
| <b>MRA</b>                                                                                                                                                                                                                                                                                                                                                          |                          | 99 (32.5%)  | 206 (67.5%)    | -                          |
| <b>Contraindications</b>                                                                                                                                                                                                                                                                                                                                            |                          |             |                | -                          |
| MRA adverse reaction                                                                                                                                                                                                                                                                                                                                                | 0, (0.0%)                | 0, (0.0%)   | 0, (0.0%)      | Not estimable              |
| <b>Cautions</b>                                                                                                                                                                                                                                                                                                                                                     |                          |             |                |                            |
| Hyperkalemia                                                                                                                                                                                                                                                                                                                                                        | 20, (6.6%)               | 5, (1.6%)   | 15, (7.3%)     | 2 (0.7%)                   |
| Significant renal dysfunction                                                                                                                                                                                                                                                                                                                                       | 40, (13.1%)              | 11, (3.6%)  | 29, (14.1%)    | 2 (0.7%)                   |
| <b>SGLT2i</b>                                                                                                                                                                                                                                                                                                                                                       |                          | 14 (4.6%)   | 291 (95.4%)    | -                          |
| <b>Contraindications</b>                                                                                                                                                                                                                                                                                                                                            |                          |             |                | -                          |
| SGLT2i adverse condition                                                                                                                                                                                                                                                                                                                                            | 0, (0.0%)                | 0, (0.0%)   | 0, (0.0%)      | Not estimable              |
| Pregnancy                                                                                                                                                                                                                                                                                                                                                           | 3, (1.0%)                | 0, (0.0%)   | 3, (1.0%)      | 0, (0.0%)                  |
| Significant renal dysfunction                                                                                                                                                                                                                                                                                                                                       | 19, (6.2%)               | 0, (0.0%)   | 19, (6.5%)     | 2 (0.7%)                   |
| Hypotension                                                                                                                                                                                                                                                                                                                                                         | 46, (15.1%)              | 1, (7.1%)   | 45, (15.5%)    | 11 (3.6%)                  |
| <b>Cautions</b>                                                                                                                                                                                                                                                                                                                                                     |                          |             |                | -                          |
| Diabetes Type 1                                                                                                                                                                                                                                                                                                                                                     | 0, (0.0%)                | 0, (0.0%)   | 0, (0.0%)      | Not estimable              |
| Genito-urinary infections                                                                                                                                                                                                                                                                                                                                           | 15, (4.9%)               | 0, (0.0%)   | 15, (5.2%)     | Not estimable              |
| ACEi, angiotensin-converting enzyme inhibitors; ARB, angiotensin receptor blockers; ARNi, angiotensin receptor–neprilysin inhibitor; MRA, mineralocorticoid receptor antagonists; SGLT2i, Sodium-glucose co-transporter 2 inhibitors; AV, atrioventricular ; NYHA, New York Heart Association<br>Not estimable = information not available due to unstructured data |                          |             |                |                            |

**Table S5.** Variables significantly dependent on outcomes.

| Variable                             | Type        | Statistical Test | p-value | Outcome                           |
|--------------------------------------|-------------|------------------|---------|-----------------------------------|
| Age (years)                          | Numerical   | Kruskal-Wallis   | 0.000   | ACEi/ARB/ARNi                     |
| NT-ProBNP (pg/mL)                    | Numerical   | Kruskal-Wallis   | 0.000   | ACEi/ARB/ARNi                     |
| Hemoglobin (g/dL)                    | Numerical   | Kruskal-Wallis   | 0.000   | ACEi/ARB/ARNi                     |
| eGFR (ml/min/1.73m <sup>2</sup> )    | Numerical   | Kruskal-Wallis   | 0.000   | ACEi/ARB/ARNi                     |
| Hyperkalemia                         | Categorical | Chi-squared      | 0.042   | ACEi/ARB/ARNi                     |
| Hypotension                          | Categorical | Chi-squared      | 0.002   | ACEi/ARB/ARNi                     |
| eGFR<30 (ml/min/1.73m <sup>2</sup> ) | Categorical | Chi-squared      | 0.000   | ACEi/ARB/ARNi                     |
| Pillar number                        | Categorical | Chi-squared      | 0.000   | ACEi/ARB/ARNi                     |
| Pillar number                        | Categorical | Chi-squared      | 0.000   | β-blocker                         |
| NT-ProBNP (pg/mL)                    | Numerical   | Kruskal-Wallis   | 0.018   | Re-hospitalization within 30 days |
| Hemoglobin (g/dL)                    | Numerical   | Kruskal-Wallis   | 0.017   | Re-hospitalization within 30 days |
| eGFR (ml/min/1.73m <sup>2</sup> )    | Numerical   | Kruskal-Wallis   | 0.036   | Re-hospitalization within 30 days |
| Pillar number                        | Categorical | Chi-square       | 0.000   | Re-hospitalization within 30 days |
| NT-ProBNP (pg/mL)                    | Numerical   | Kruskal-Wallis   | 0.000   | Pilar number                      |
| Hemoglobin (g/dL)                    | Numerical   | Kruskal-Wallis   | 0.020   | Pilar number                      |
| eGFR (ml/min/1.73m <sup>2</sup> )    | Numerical   | Kruskal-Wallis   | 0.000   | Pilar number                      |
| eGFR<30 (ml/min/1.73m <sup>2</sup> ) | Categorical | Chi-squared      | 0.000   | Pilar number                      |
| Critical limb ischaemia              | Categorical | Chi-squared      | 0.003   | Pilar number                      |
| Diabetes                             | Categorical | Chi-squared      | 0.007   | Pilar number                      |

ACEi, angiotensin-converting enzyme inhibitor; ARB, angiotensin receptor blocker; ARNi, angiotensin receptor–neprilysin inhibitor; eGFR, estimated glomerular filtration rate; NYHA, New York Heart Association; NT-proBNP, N-terminal pro hormone brain natriuretic peptide;

**Table S6.** Predictors of prescription of Renin-angiotensin system inhibitors/Angiotensin receptor neprilysin inhibitor

**Renin-angiotensin system inhibitors/Angiotensin receptor neprilysin inhibitor**

|                                                        | Unadjusted OR<br>(95% CI) | Adjusted OR<br>(95% CI) | p-value     | Baseline     |
|--------------------------------------------------------|---------------------------|-------------------------|-------------|--------------|
| <b>eGFR&lt;30 ml/min/1.73m<sup>2</sup> (Yes vs No)</b> | 0.07 (0.03,0.16)          | 0.08 (0.03,0.19)        | 0.000/0.000 | <b>68.2%</b> |
| <b>Hypotension (Yes vs No)</b>                         | 0.32 (0.16,0.65)          | 0.29 (0.13,0.64)        | 0.002/0.002 |              |
| <b>Hyperkalemia (Yes vs No)</b>                        | 0.36 (0.14,0.89)          | 0.42 (0.14,1.24)        | 0.028/0.115 |              |
| <b>Diabetes (Yes vs No)</b>                            | 0.60 (0.36,1.00)          |                         | 0.048       |              |
| <b>Age (Per 1 year increase)</b>                       | 0.95 (0.93,0.98)          | 0.96 (0.94,0.99)        | 0.000/0.002 |              |
| <b>NT-ProBNP (Per 100 pg/mL increase)</b>              | 0.99 (0.99,1.00)          |                         | 0.000       |              |
| <b>Hemoglobin (Per 1g/dL increase)</b>                 | 1.25 (1.12,1.40)          |                         | 0.000       |              |
| <b>eGFR (Per 10 ml/min/1.73m<sup>2</sup> increase)</b> | 1.48 (1.31,1.67)          |                         | 0.000       |              |

eGFR, estimated glomerular filtration rate; NT-proBNP, N-terminal pro hormone brain natriuretic peptide; OR, odds ratio.



**Figure S1. Data extraction workflow**

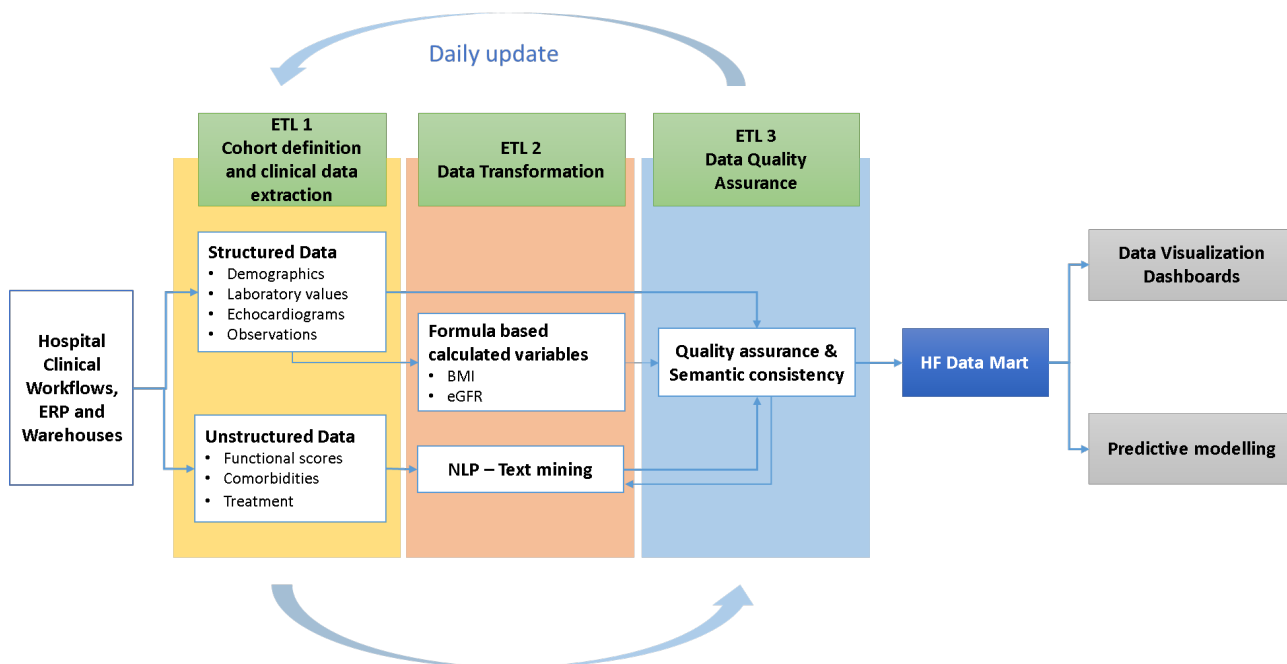

ERP, Enterprise resource planning; ETL, Extract Transform Load; BMI, Body Mass Index; NYHA, New York Heart Association; NLP, Natural Language Processing; eGFR, estimated glomerular filtration rate; HF, Heart Failure

**Figure S2. Trajectories of drugs use at admission and at discharge**

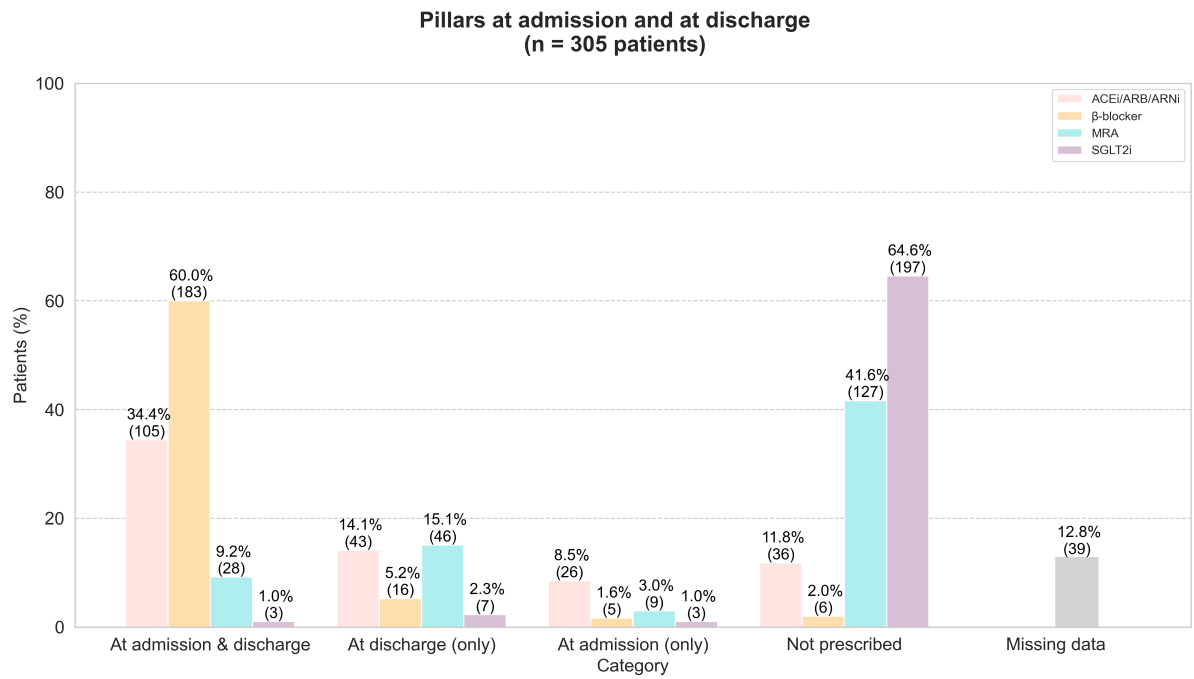

ACEi, angiotensin-converting enzyme inhibitors; ARB, angiotensin receptor blockers; ARNi, angiotensin receptor–neprilysin inhibitor; MRA, mineralocorticoid receptor antagonists; SGLT2i, Sodium-glucose co-transporter 2 inhibitors.

**Figure S3.** Univariate stratified analysis for the 30-day risk of readmission

**Univariate stratified logistic regression analysis  
(Age and Renal function)**

Unadjusted odds ratio  
(per drugs number  $\geq 2$ )

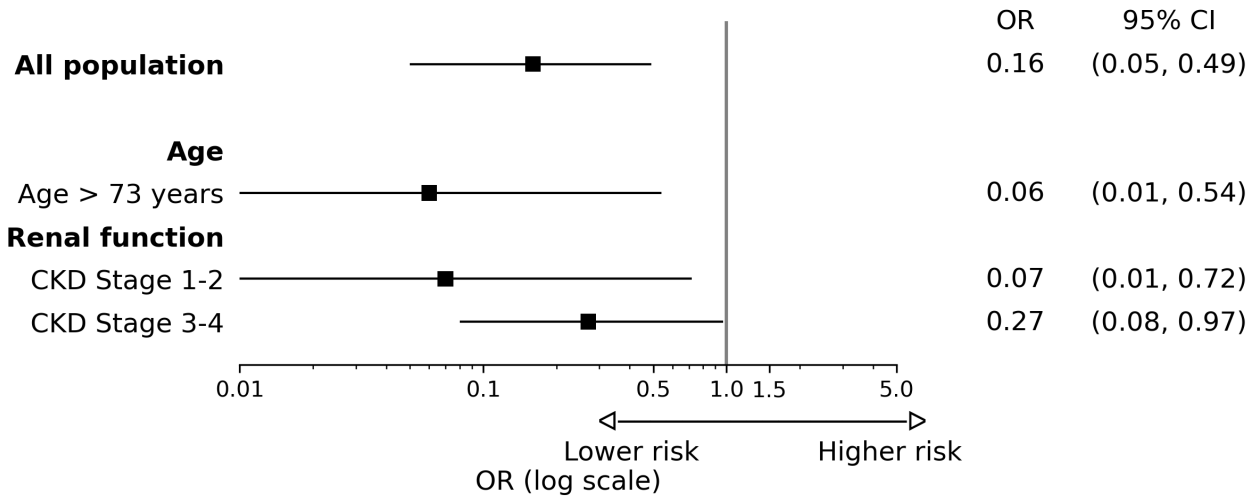

CI = confidence intervals, CKD = Chronic kidney disease, OR = odds ratio
